# Supplementary material
Source: bioRxiv or medRxiv preprint supplement (https://www.biorxiv.org/highwire/filestream/24571/field_highwire_adjunct_files/0/087932-1.pdf)
Supplement: Supplementary file [file 087932-1.pdf]

# biMM: Efficient estimation of genetic variances and covariances for cohorts with high-dimensional phenotype measurements

## Supplementary information

Matti Pirinen et al.

November 12, 2016

### Contents

|                                                               |          |
|---------------------------------------------------------------|----------|
| <b>S1 Data used in Example analysis</b>                       | <b>2</b> |
| <b>S2 Comparison of the methods</b>                           | <b>2</b> |
| <b>S3 Polygenic model for genome-wide data</b>                | <b>3</b> |
| S3.1 Univariate polygenic model . . . . .                     | 5        |
| S3.2 Bivariate polygenic model . . . . .                      | 6        |
| S3.3 biMM algorithm . . . . .                                 | 7        |
| S3.3.1 Likelihood computation . . . . .                       | 8        |
| S3.3.2 Ordering pairs, imputing and dropping values . . . . . | 10       |
| S3.4 Testing biMM . . . . .                                   | 11       |

| ID  | Trait                    | $N$  | $h_{ex}^2$ | $SE_{ex}$ | $h_{ap}^2$ | $SE_{ap}$ |
|-----|--------------------------|------|------------|-----------|------------|-----------|
| BMI | Body mass index          | 4843 | 0.277      | 0.056     | 0.277      | 0.056     |
| CRP | C-reactive protein       | 4945 | 0.269      | 0.046     | 0.281      | 0.048     |
| DBP | Diastolic blood pressure | 4736 | 0.118      | 0.057     | 0.115      | 0.056     |
| FGL | Fasting glucose          | 4820 | 0.165      | 0.053     | 0.164      | 0.053     |
| HDL | HDL cholesterol          | 4843 | 0.300      | 0.055     | 0.307      | 0.056     |
| HGT | Standing height          | 5025 | 0.614      | 0.053     | 0.610      | 0.055     |
| HIP | Hip circumference        | 4814 | 0.185      | 0.058     | 0.187      | 0.058     |
| FIN | Fasting insulin          | 4792 | 0.146      | 0.056     | 0.143      | 0.056     |
| LDL | LDL cholesterol          | 4828 | 0.354      | 0.057     | 0.350      | 0.057     |
| SBP | Systolic blood pressure  | 4743 | 0.127      | 0.057     | 0.137      | 0.056     |
| TC  | Total cholesterol        | 4843 | 0.279      | 0.056     | 0.277      | 0.056     |
| TG  | Triglycerides            | 4842 | 0.192      | 0.056     | 0.188      | 0.056     |
| WHR | Waist-hip ratio          | 4814 | 0.102      | 0.053     | 0.098      | 0.053     |
| WAI | Waist circumference      | 4815 | 0.140      | 0.055     | 0.140      | 0.055     |
| WGT | Weight                   | 4843 | 0.238      | 0.057     | 0.238      | 0.057     |
| WAB | WHR adjusted for BMI     | 4812 | 0.082      | 0.054     | 0.080      | 0.053     |

Table S1: Sixteen quantitative traits analysed in NFBC1966 data. Heritability estimate ( $h^2$ ) and its standard error (SE) are from biMM. Exact (ex) analysis was ran with  $t_i = t_d = 0$  and approximate (ap) analysis was ran with  $t_i = t_d = 200$ .  $N$  is the number of individuals with a measurement for the trait.

## S1 Data used in Example analysis

The Northern Finland Birth Cohort 1966 (NFBC1966) is a birth cohort study of children born in 1966 in the two northernmost provinces of Finland originally designed to focus on factors affecting pre-term birth, low birth weight, and subsequent morbidity and mortality [10]. The blood sample for the DNA extraction and all phenotype data used in the present study were collected at a follow-up visit when the participants were 31 years of age. The phenotypes (Table S1) were adjusted for sex and first ten principal components of genetic structure. Additionally, blood pressure measurements were adjusted for BMI. The phenotype data are the same as used by Tukiainen *et al.* [12].

Genotyping was done using Illumina 370K chip. We computed the genetic relationship matrix  $\mathbf{R}$  by using  $K = 319,445$  genotyped SNPs with minor-allele frequency (MAF) above 0.01.

## S2 Comparison of the methods

Below we show the scatter plots for six pairs of the four methods: biMM (complete,  $t_i = t_d = 0$ ), GEMMA [19], BOLT-REML [8] and GCTA [16] across 120 trait pairs reported in Example analysis of the main paper, for heritabilities  $V_G$ ,

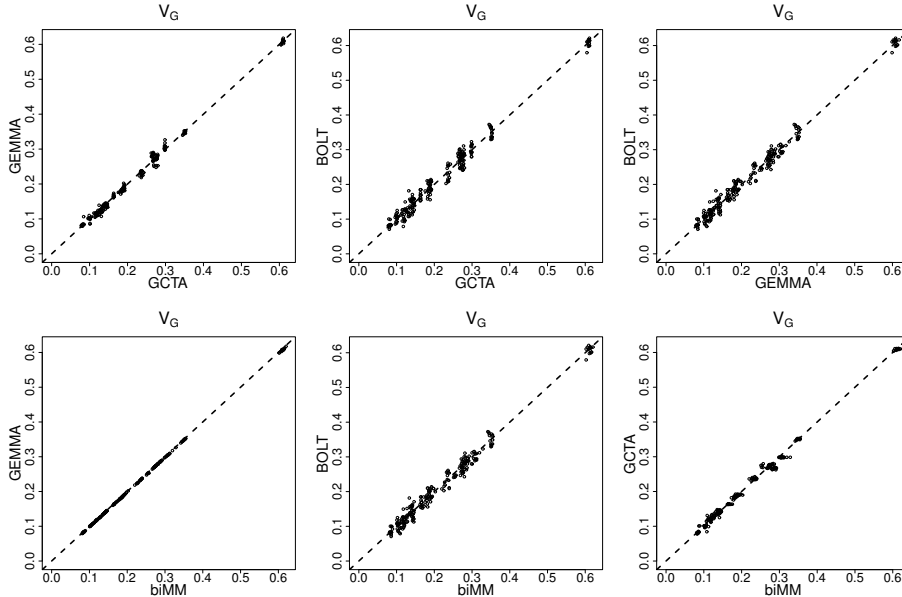

Figure S1: Heritability estimates across 120 pairs of traits from NFB1966 data.

genetic correlations  $\rho_G$  and their standard errors  $SE(V_G)$  and  $SE(\rho_G)$ .

### S3 Polygenic model for genome-wide data

To derive the linear mixed model, we consider a polygenic model that assumes that the genetic component of the traits is distributed among a large number of individual variants having additive effects. When applied to “unrelated” individuals (or more precisely, only very distantly related individuals from our population cohorts), the model decomposes the trait variance into an additive genetic component ( $G$ ) that is due to the available panel of SNPs, and the environmental component ( $\varepsilon$ ) that includes also higher order genetic components together with the part of the additive component that is not captured by  $G$ . In particular, the bivariate model can be used for estimating a lower bound for the additive genetic variance for both phenotypes, the correlation between the additive genetic components of the two phenotypes and the correlation between the environmental components of the two phenotypes.

For large-scale human genetic studies with a univariate phenotype, the corresponding model was introduced by Yang et al. in their software package GCTA [15] and further explained by Visscher et al. [13] and Zaitlen and Kraft [17]. The bivariate extension was recently considered by Deary et al. [4], Korte et al. [6] and Davis et al. [3], and an extension to more than two traits by the GEMMA algorithm of Zhou and Stephens [19] and BOLT-REML by Loh et al.

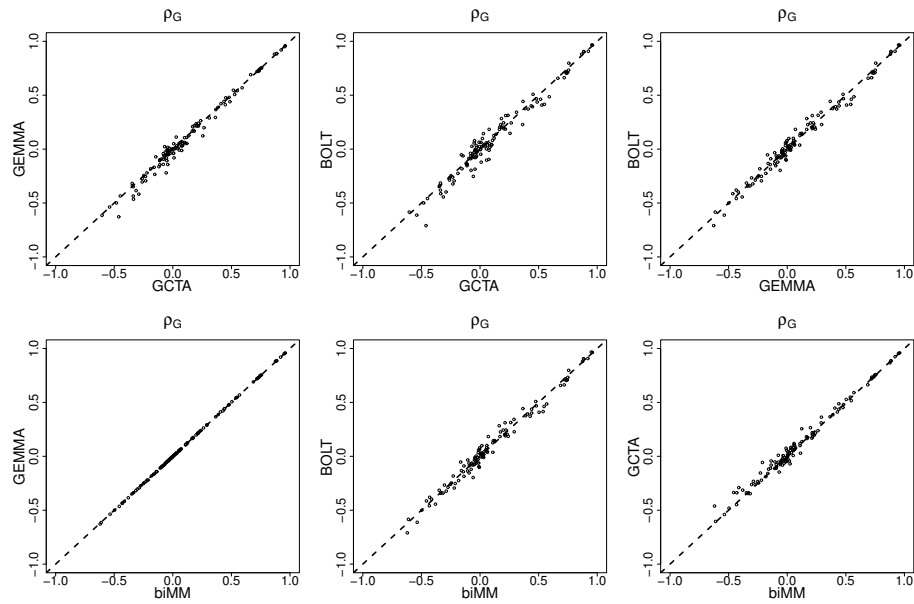

Figure S2: Genetic correlation estimates across 120 pairs of traits from NFB1966 data.

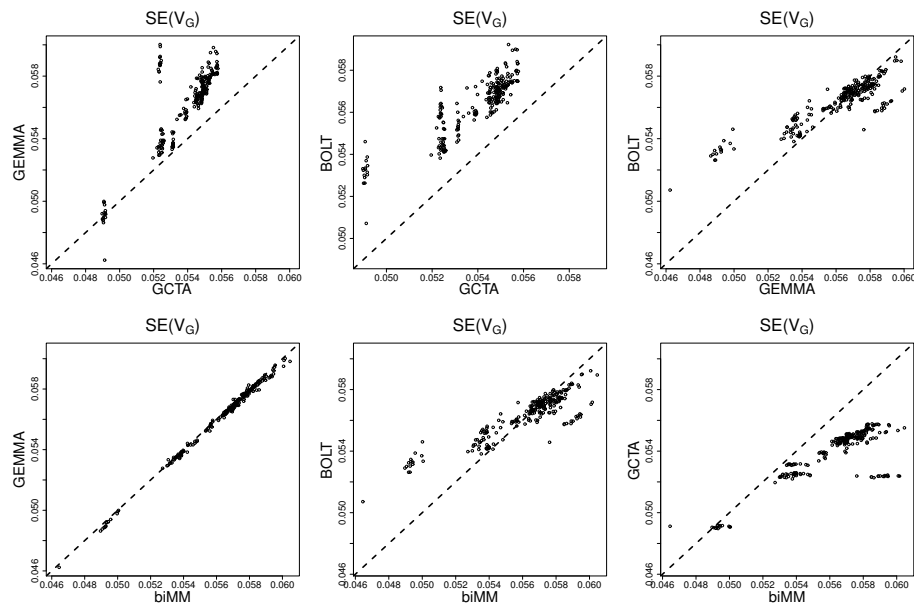

Figure S3: Estimated standard errors of heritability estimates across 120 pairs of traits from NFB1966 data.

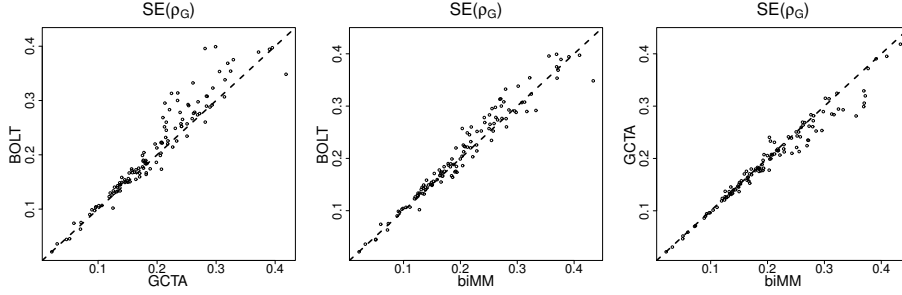

Figure S4: Estimates of standard errors of genetic correlation estimates across 120 pairs of traits from NFBC1966 data. Not available for GEMMA.

[8]. A completely new way to estimate some of the parameters of the univariate and bivariate polygenic model via LD-score regression using summary statistics from genome-wide association studies was recently introduced by Bulik-Sullivan et al. [2, 1].

Next we formulate the univariate (section 3.1) and bivariate (section 3.2) versions of the model, explain how we do the computation efficiently (section 3.3) and give simulation results to verify that we have a valid interpretation of the parameter estimates (section 3.4).

### S3.1 Univariate polygenic model

We start by describing the model for a univariate phenotype (say phenotype 1). Let  $\mathbf{Y}_1$  be a vector of observed quantitative measurements for  $n$  individuals. Let  $g_{ik}^*$  be the standardized genotype of individual  $i$  at SNP  $k$ , that is,

$$g_{ik}^* = \frac{g_{ik} - 2\hat{f}_k}{\sqrt{2\hat{f}_k(1 - \hat{f}_k)}},$$

where  $g_{ik}$  is the minor allele count (0,1 or 2) that  $i$  carries at locus  $k$  and  $\hat{f}_k = \frac{1}{2n} \sum_{i=1}^n g_{ik}$  is the sample allele frequency. The linear model assumes that

$$y_{i1} = \mu_{i1} + \sum_k g_{ik}^* \beta_{k1} + \varepsilon_{i1}, \quad (\text{S1})$$

where  $\beta_{k1}$  is the effect of SNP  $k$  on  $Y_1$ ,  $\varepsilon_{i1}$  is the environmental term of  $Y_1$  for individual  $i$  and the sum is over all the SNPs. The term  $\mu_{i1}$  describes the expected phenotype of individual  $i$  after all the non-genetic covariates (such as age, sex and cohort) have been taken into account, for example, by considering residuals from a regression model.

Following [15], we assume that  $\beta_{k1} \sim \mathcal{N}(0, v_{g1})$  for each SNP  $k$  and  $\varepsilon_{i1} \sim \mathcal{N}(0, V_{\varepsilon 1})$  for each individual  $i$ . Then the additive genetic variance of  $Y_1$  due to

the SNPs,

$$V_{G1} = \text{Var} \left( \sum_{k=1}^K g_{ik}^* \beta_{k1} \right) \approx \sum_{k=1}^K \text{Var} (g_{ik}^* \beta_{k1}) = K v_{g1},$$

can be estimated by a linear mixed model formulation of the model (S1) [15, 17]:

$$\mathbf{Y}_1 = \boldsymbol{\mu}_1 + \mathbf{G}_1 + \boldsymbol{\varepsilon}_1, \quad (\text{S2})$$

where  $\boldsymbol{\varepsilon}_1 \sim \mathcal{N}(0, V_{\varepsilon_1} \mathbf{I})$  and  $\mathbf{G}_1 \sim \mathcal{N}(0, V_{G1} \mathbf{R})$  with the element  $\mathbf{R}_{ij}$  of the matrix  $\mathbf{R}$  being

$$\mathbf{R}_{ij} = \frac{1}{K} \sum_k g_{ik}^* g_{jk}^* = \frac{1}{K} \sum_k \frac{(g_{ik} - 2\hat{f}_k)(g_{jk} - 2\hat{f}_k)}{2\hat{f}_k(1 - \hat{f}_k)}.$$

Note that since the variance of the effect size distribution,  $v_{g1}$ , is the same for all standardized SNPs, it follows that the variance of the effect size distribution for an allele at SNP  $k$ ,  $v_{g1}/(2\hat{f}_k(1 - \hat{f}_k))$ , grows as the minor allele frequency  $\hat{f}_k$  decreases. Thus, this model assumes larger per allele effect sizes at rarer SNPs than at more common SNPs.

### S3.2 Bivariate polygenic model

We follow the extension of the linear model to the bivariate case given by [4]. This corresponds to the model  $\mathbf{Y} = \boldsymbol{\mu} + \mathbf{G} + \boldsymbol{\varepsilon}$ , where

$$\mathbf{Y} = \begin{bmatrix} \mathbf{Y}_1 \\ \mathbf{Y}_2 \end{bmatrix}, \quad \boldsymbol{\mu} = \begin{bmatrix} \boldsymbol{\mu}_1 \\ \boldsymbol{\mu}_2 \end{bmatrix}, \quad \mathbf{G} \sim \mathcal{N}(0, \boldsymbol{\Sigma}_G), \quad \text{and} \quad \boldsymbol{\varepsilon} \sim \mathcal{N}(0, \boldsymbol{\Sigma}_\varepsilon), \quad (\text{S3})$$

with

$$\boldsymbol{\Sigma}_G = \begin{bmatrix} V_{G1} \mathbf{R} & V_{G12} \mathbf{R} \\ V_{G12} \mathbf{R} & V_{G2} \mathbf{R} \end{bmatrix} \quad \text{and} \\ \boldsymbol{\Sigma}_\varepsilon = \begin{bmatrix} V_{\varepsilon_1} \mathbf{I} & V_{\varepsilon_{12}} \mathbf{I} \\ V_{\varepsilon_{12}} \mathbf{I} & V_{\varepsilon_2} \mathbf{I} \end{bmatrix}$$

expressed as  $n \times n$  blocks, where  $n$  is the number of individuals.

From this model, an estimate of  $V_{Gt}$  gives a lower bound for the additive genetic variance of each trait ( $t = 1, 2$ ) and thus can be used to estimate a lower bound for the (narrow-sense) heritability. We can also estimate the genetic correlation  $\rho_G = V_{G12}/\sqrt{V_{G1}V_{G2}}$  which can be interpreted as the correlation of

the additive genetic components. Similarly we can estimate  $\rho_\varepsilon = V_{\varepsilon 12}/\sqrt{V_{\varepsilon 1}V_{\varepsilon 2}}$ , the correlation in the environmental terms between the phenotypes.

At the level of individual genetic effects, this model corresponds to the assumption that for all  $k \leq K$

$$\begin{bmatrix} \beta_{k1} \\ \beta_{k2} \end{bmatrix} \sim \mathcal{N}_2 \left( 0, \begin{bmatrix} v_{g1} & v_{g12} \\ v_{g12} & v_{g2} \end{bmatrix} \right), \quad (\text{S4})$$

where  $v_{gt}$  is the variance of the individual genetic effect on trait  $t = 1, 2$  and  $v_{g12}$  is the covariance between the effects of a single variant on the two traits. We will consider the consequences of this assumption below at section S3.4.

### S3.3 biMM algorithm

Our goal is to make an efficient algorithm for estimating (co)variance parameters in the setting where hundreds of traits have been measured on the same set of individuals. For this purpose, we extend computational solutions of previous algorithms on a univariate linear mixed model [18, 7, 9] to the bivariate case. The biMM algorithm described here has not been published before although M Pirinen has applied some ideas of biMM’s likelihood computation in an earlier study of reading and mathematics skills [3].

Recently, general algorithms for multivariate linear mixed models have been introduced by Zhou and Stephens [19] and Loh et al. [8] with applications to genome-wide data sets. We see two main contributions of the biMM algorithm given the existing work in the field: (1) a new and simple way to write down the likelihood function of bivariate LMM using  $\mathcal{O}(n)$  operations; and (2) implementation that is particularly efficient for estimating pairwise variance components across thousands of trait pairs including the functionality to order traits suitably and to impute or to ignore only some trait values as necessary for efficient computation.

While an appropriately adjusted version of the GEMMA algorithm of Zhou and Stephens [19] might also lead to a quick bivariate likelihood computation, to our knowledge, no publicly available implementation is available to efficiently handle our setting of hundreds of traits.

BOLT-REML algorithm of Loh et al. [8] is the only existing linear mixed model implementation that can run on 100,000s of individuals. Since BOLT-REML bypasses the generation of the explicit relationship matrix, it is based on very different approximations compared to biMM, GEMMA or GCTA. The differences in heritability estimates between the methods were a bit larger between BOLT-REML and the other methods (Figure S1) than among the other methods themselves. Additionally, BOLT-REML is much slower than biMM or GEMMA with cohorts of about 5,000 individuals tested in the main paper. Thus, while BOLT-REML importantly extends the range of linear mixed model computations to very large cohorts, there are good reasons to still consider the

approach based on explicit matrix computations when those are feasible to carry out, i.e., when the cohort size is up to a few tens of thousands of individuals.

### S3.3.1 Likelihood computation

The log-likelihood function for model (S3), after the covariates and the population mean in  $\boldsymbol{\mu}$  have been regressed out from  $\mathbf{Y}$ , is

$$L(\mathbf{V}) = -n \log(2\pi) - \frac{1}{2} \log(|\boldsymbol{\Sigma}|) - \frac{1}{2} \mathbf{Y}^T \boldsymbol{\Sigma}^{-1} \mathbf{Y}, \quad (\text{S5})$$

where variance parameters  $\mathbf{V} = (V_{G1}, V_{G2}, V_{G12}, V_{\varepsilon1}, V_{\varepsilon2}, V_{\varepsilon12})$  are included in the matrix  $\boldsymbol{\Sigma} = \boldsymbol{\Sigma}_G + \boldsymbol{\Sigma}_\varepsilon$ , and  $|\boldsymbol{\Sigma}|$  denotes the determinant of  $\boldsymbol{\Sigma}$ .

The eigenvalue decomposition of the positive semi-definite matrix  $\mathbf{R}$  yields an orthonormal  $n \times n$ -matrix  $\mathbf{U}$  of eigenvectors and a diagonal  $n \times n$ -matrix  $\mathbf{D}$  of non-negative eigenvalues for which  $\mathbf{R} = \mathbf{U} \mathbf{D} \mathbf{U}^T$  (see e.g. [5]). Because  $\mathbf{U} \mathbf{U}^T = \mathbf{I}$  (orthonormality) it follows that

$$\begin{aligned} \boldsymbol{\Sigma} &= \left[ \begin{array}{c|c} V_{G1} \mathbf{R} + V_{\varepsilon1} \mathbf{I} & V_{G12} \mathbf{R} + V_{\varepsilon12} \mathbf{I} \\ \hline V_{G12} \mathbf{R} + V_{\varepsilon12} \mathbf{I} & V_{G2} \mathbf{R} + V_{\varepsilon2} \mathbf{I} \end{array} \right] \\ &= \left[ \begin{array}{c|c} \mathbf{U} & \mathbf{0} \\ \hline \mathbf{0} & \mathbf{U} \end{array} \right] \left[ \begin{array}{c|c} V_{G1} \mathbf{D} + V_{\varepsilon1} \mathbf{I} & V_{G12} \mathbf{D} + V_{\varepsilon12} \mathbf{I} \\ \hline V_{G12} \mathbf{D} + V_{\varepsilon12} \mathbf{I} & V_{G2} \mathbf{D} + V_{\varepsilon2} \mathbf{I} \end{array} \right] \left[ \begin{array}{c|c} \mathbf{U}^T & \mathbf{0} \\ \hline \mathbf{0} & \mathbf{U}^T \end{array} \right] \\ &= \left[ \begin{array}{c|c} \mathbf{U} & \mathbf{0} \\ \hline \mathbf{0} & \mathbf{U} \end{array} \right] \left[ \begin{array}{c|c} \boldsymbol{\Delta}(a_{i1}) & \boldsymbol{\Delta}(a_{i12}) \\ \hline \boldsymbol{\Delta}(a_{i12}) & \boldsymbol{\Delta}(a_{i2}) \end{array} \right] \left[ \begin{array}{c|c} \mathbf{U}^T & \mathbf{0} \\ \hline \mathbf{0} & \mathbf{U}^T \end{array} \right], \end{aligned}$$

where  $\boldsymbol{\Delta}(a_{i1})$  is the diagonal matrix whose diagonal elements are  $a_{i1}, \dots, a_{n1}$  and we have used notation

$$\begin{aligned} a_{i1} &= V_{G1} d_i + V_{\varepsilon1} \\ a_{i2} &= V_{G2} d_i + V_{\varepsilon2} \\ a_{i12} &= V_{G12} d_i + V_{\varepsilon12}, \end{aligned}$$

where  $d_i$  is the  $i$ th eigenvalue of  $\mathbf{R}$ , that is, the element  $(i, i)$  of  $\mathbf{D} = \boldsymbol{\Delta}(d_i)$ .

To compute the determinant, we use the fact [11] that if  $\mathbf{B}_3 \mathbf{B}_4 = \mathbf{B}_4 \mathbf{B}_3$  for a block matrix

$$\mathbf{B} = \left[ \begin{array}{c|c} \mathbf{B}_1 & \mathbf{B}_2 \\ \hline \mathbf{B}_3 & \mathbf{B}_4 \end{array} \right], \text{ then } \det(\mathbf{B}) = \det(\mathbf{B}_1 \mathbf{B}_4 - \mathbf{B}_2 \mathbf{B}_3).$$

$$\begin{aligned} \det(\boldsymbol{\Sigma}) &= \det(\mathbf{U} \mathbf{U} - \mathbf{0} \mathbf{0}) \\ &\times \det(\boldsymbol{\Delta}(a_{i1}) \boldsymbol{\Delta}(a_{i2}) - \boldsymbol{\Delta}(a_{i12}) \boldsymbol{\Delta}(a_{i12})) \\ &\times \det(\mathbf{U}^T \mathbf{U}^T - \mathbf{0} \mathbf{0}) \\ &= 1 \times \prod_{i=1}^n (a_{i1} a_{i2} - a_{i12}^2) \times 1 \\ &= \prod_{i=1}^n c_i, \end{aligned}$$



where

$$c_i = a_{i1}a_{i2} - a_{i12}^2, \text{ for } i = 1, \dots, n.$$

To compute the inverse  $\Sigma^{-1}$  we use a formula for block matrices:

$$\left[ \begin{array}{c|c} \mathbf{B}_1 & \mathbf{B}_2 \\ \mathbf{B}_3 & \mathbf{B}_4 \end{array} \right]^{-1} = \left[ \begin{array}{c|c} (\mathbf{B}_1 - \mathbf{B}_2\mathbf{B}_4^{-1}\mathbf{B}_3)^{-1} & -(\mathbf{B}_1 - \mathbf{B}_2\mathbf{B}_4^{-1}\mathbf{B}_3)^{-1}\mathbf{B}_2\mathbf{B}_4^{-1} \\ -(\mathbf{B}_4 - \mathbf{B}_3\mathbf{B}_1^{-1}\mathbf{B}_2)^{-1}\mathbf{B}_3\mathbf{B}_1^{-1} & (\mathbf{B}_4 - \mathbf{B}_3\mathbf{B}_1^{-1}\mathbf{B}_2)^{-1} \end{array} \right].$$

By applying this to matrix

$$\mathbf{A} = \left[ \begin{array}{c|c} \Delta(a_{i1}) & \Delta(a_{i12}) \\ \Delta(a_{i12}) & \Delta(a_{i2}) \end{array} \right],$$

we have that

$$\mathbf{A}^{-1} = \left[ \begin{array}{c|c} \Delta(\frac{1}{c_i}) & \mathbf{0} \\ \mathbf{0} & \Delta(\frac{1}{c_i}) \end{array} \right] \left[ \begin{array}{c|c} \Delta(a_{i2}) & \Delta(-a_{i12}) \\ \Delta(-a_{i12}) & \Delta(a_{i1}) \end{array} \right].$$

By transformation

$$\tilde{\mathbf{Y}} = \left[ \begin{array}{c|c} \mathbf{U}^T & \mathbf{0} \\ \mathbf{0} & \mathbf{U}^T \end{array} \right] \mathbf{Y}$$

the log-likelihood (S5) becomes

$$\begin{aligned} L(\mathbf{V}) &= -n \log(2\pi) - \frac{1}{2} \log(|\Sigma|) - \frac{1}{2} \mathbf{Y}^T \Sigma^{-1} \mathbf{Y} \\ &= -n \log(2\pi) - \frac{1}{2} \sum_{i=1}^n \log(c_i) - \frac{1}{2} \tilde{\mathbf{Y}}^T \mathbf{A}^{-1} \tilde{\mathbf{Y}} \\ &= -n \log(2\pi) - \frac{1}{2} \sum_{i=1}^n \log(c_i) - \frac{1}{2} \sum_{i=1}^n \frac{\tilde{y}_{i1}^2 a_{i2} + \tilde{y}_{i2}^2 a_{i1} - 2\tilde{y}_{i1}\tilde{y}_{i2}a_{i12}}{c_i}. \end{aligned}$$

For each set of values of the parameters  $\mathbf{V}$ , the evaluation of the log-likelihood requires  $\mathcal{O}(n)$  basic operations, where  $n$  is the number of individuals. Note that a naive evaluation of the likelihood would require  $\mathcal{O}(n^3)$  operations for each set of parameters due to computational complexity of the determinant and matrix inversion.

To optimize the likelihood we use a combination of Nelder-Mead and BFGS algorithms as implemented in the `optim` function of the R software package. For BFGS we need the gradient of the log-likelihood.

## Derivatives

With the notation defined above we have:

$$\begin{aligned}
\frac{\partial L}{\partial V_{G1}} &= -\frac{1}{2} \sum_{i=1}^n \frac{d_i c_i (a_{i2} + \widetilde{y}_{i2}^2) - d_i a_{i2} b_i}{c_i^2} \\
\frac{\partial L}{\partial V_{G2}} &= -\frac{1}{2} \sum_{i=1}^n \frac{d_i c_i (a_{i1} + \widetilde{y}_{i1}^2) - d_i a_{i1} b_i}{c_i^2} \\
\frac{\partial L}{\partial V_{\varepsilon 1}} &= -\frac{1}{2} \sum_{i=1}^n \frac{c_i (a_{i2} + \widetilde{y}_{i2}^2) - a_{i2} b_i}{c_i^2} \\
\frac{\partial L}{\partial V_{\varepsilon 2}} &= -\frac{1}{2} \sum_{i=1}^n \frac{c_i (a_{i1} + \widetilde{y}_{i1}^2) - a_{i1} b_i}{c_i^2} \\
\frac{\partial L}{\partial V_{G12}} &= -\frac{1}{2} \sum_{i=1}^n \frac{-2d_i c_i (a_{i12} + \widetilde{y}_{i1} \widetilde{y}_{i2}) + 2d_i a_{i12} b_i}{c_i^2} \\
\frac{\partial L}{\partial V_{\varepsilon 12}} &= -\frac{1}{2} \sum_{i=1}^n \frac{-2c_i (a_{i12} + \widetilde{y}_{i1} \widetilde{y}_{i2}) + 2a_{i12} b_i}{c_i^2}
\end{aligned}$$

where

$$b_i = \widetilde{y}_{i1}^2 a_{i2} + \widetilde{y}_{i2}^2 a_{i1} - 2\widetilde{y}_{i1} \widetilde{y}_{i2} a_{i12}, \text{ for } i = 1, \dots, n.$$

### S3.3.2 Ordering pairs, imputing and dropping values

To make eigendecomposition as reusable as possible biMM orders the trait pairs (or traits in the univariate case) to maximize the sample overlap between consecutive pairs.

Given the first pair, we greedily choose the next pair from among the pairs having the smallest distance to the current pair. Here the distance between the pairs means the number of individuals for which one of the trait pairs has complete data and the other pair does not have complete data. After the second pair is chosen, the same process continues through the subsequent trait pairs until the full ordering is determined. If the first pair is not given, biMM iterates over all possible starting values and chooses the one that leads to the smallest number of eigendecompositions given the parameters  $t_i$  and  $t_d$ .

The input values  $t_i$  and  $t_d$  determine, respectively, for how many individuals biMM is allowed to impute the missing trait values and for how many individuals biMM is allowed to set the trait values missing, i.e., to drop the individuals from the analysis. The current implementation allows the user to specify how many (most correlated) traits are used for imputing the missing values from the multivariate normal distribution. The default value is 0 and corresponds to the mean value imputation.

### S3.4 Testing biMM

Assume that there are  $S$  shared variants that affect both traits and  $T_1$  and  $T_2$  variants that affect only trait 1 and trait 2, respectively. Assume further that the effect sizes for all these variants follow the normal distribution with zero mean and variances  $v_{g1}$  for trait 1 and  $v_{g2}$  for trait 2, and that for each shared variant  $j$ ,  $\text{cor}(\beta_{j1}, \beta_{j2}) = \rho_S$ . Then the covariance between the genetic components of individual  $i$  is

$$\text{Cov}(G_{i1}, G_{i2}) = S\rho_S\sqrt{v_{g1}v_{g2}}$$

and the genetic variances are  $V_{G1} = (S + T_1)v_{g1}$  and  $V_{G2} = (S + T_2)v_{g2}$ . It follows that the genetic correlation is

$$\rho_G = \frac{S\rho_S}{\sqrt{S + T_1}\sqrt{S + T_2}} = \frac{\rho_S}{\sqrt{1 + T_1/S}\sqrt{1 + T_2/S}}. \quad (\text{S6})$$

In particular, if  $T_1 = T_2 = 0$  (all variants shared), then  $\rho_G = \rho_S$ , but if  $\max\{T_1, T_2\} \gg S$  (most variants trait-specific), then  $\rho_G \approx 0$ , independent of  $\rho_S$ . In general, the genetic correlation  $\rho_G$  is an average property of all variants affecting the traits that results from shrinking the shared correlation  $\rho_S$  by (harmonic mean of) the proportion of the shared genetic effects.

We hope that by the linear mixed model we could get unbiased estimates of genetic variances  $V_{G1}$  and  $V_{G2}$  as well as correlation parameters  $\rho_G$  and  $\rho_\varepsilon$ . However, this is not self-evident, because the model makes an assumption that every one of the  $K$  variants in the genome comes from the non-zero bivariate effect size distribution, which is clearly violated whenever only a minority of the variants truly have a non-zero effect. Thus, to validate our interpretation of the variance parameters in a realistic scenarios, and to verify our implementation of biMM, we did some simulation studies. Recently, some theoretical conditions for unbiasedness of univariate variance parameters have been listed by Yang et al. [14].

**Simulations:** We chose 5,000 individuals from the NFBC1966 data and used the  $\mathbf{R}$  matrix of  $K = 319,445$  genotyped SNPs with minor-allele frequency (MAF) above 0.01. We further extracted from the total set of SNPs a subset of 20,000 approximately equally spaced SNPs from which we picked those that truly affected the phenotypes. We generated 1,000 data sets under each of the six scenarios by varying values for the parameters at columns 2 to 8 in Table S2, which uniquely determine  $\rho_G$  and  $\rho_\varepsilon$  given in the last two columns of Table S2. We always kept the total variance of both traits at 1 and sampled the effect sizes for the variants from the Gaussian distribution with variance  $V_{Gt}/(S + T_t)$  for trait  $t$ , and with the correlation  $\rho_S$  for the shared variants.

**Results:** The distribution of the maximum likelihood estimates over the 1,000 data sets for four parameters  $V_{G1}$ ,  $V_{G2}$ ,  $\rho_G$  and  $\rho_\varepsilon$  are given in Figure S5. Figure S5 shows that biMM gives (nearly) unbiased estimates of the parameters in all six scenarios that vary in the heritability, in the sign and magnitude of the correlations as well as in the proportion of the variants shared.

| Scenario | $V_{G1}$ | $V_{G2}$ | $S$  | $T_1$ | $T_2$ | $\rho$ | $\rho_S$ | $\rho_G$ | $\rho_\varepsilon$ |
|----------|----------|----------|------|-------|-------|--------|----------|----------|--------------------|
| 1        | 0.2      | 0.5      | 200  | 200   | 800   | 0.5    | 0.8      | 0.25     | 0.66               |
| 2        | 0.2      | 0.5      | 200  | 200   | 800   | -0.4   | 0.8      | 0.25     | -0.76              |
| 3        | 0.2      | 0.5      | 400  | 0     | 600   | 0.4    | -0.6     | -0.38    | 0.82               |
| 4        | 0.3      | 0.8      | 100  | 100   | 1900  | 0.0    | 0.6      | 0.09     | -0.12              |
| 5        | 0.2      | 0.3      | 2    | 198   | 1998  | -0.5   | 0.0      | 0        | -0.67              |
| 6        | 0.2      | 0.5      | 1000 | 1000  | 1000  | 0.0    | 0.8      | 0.4      | -0.2               |

Table S2: Parameters for data simulation.  $V_{Gt}$  is the total genetic variance for trait  $t = 1, 2$ ,  $S$  is the number of shared variants,  $T_t$  is the number of variants specific to trait  $t = 1, 2$ ,  $\rho$  is the total correlation between the traits,  $\rho_S$  is the correlation of the effect sizes of the shared variants,  $\rho_G$  is the genetic correlation between the traits,  $\rho_\varepsilon$  is the environmental correlation between the traits.

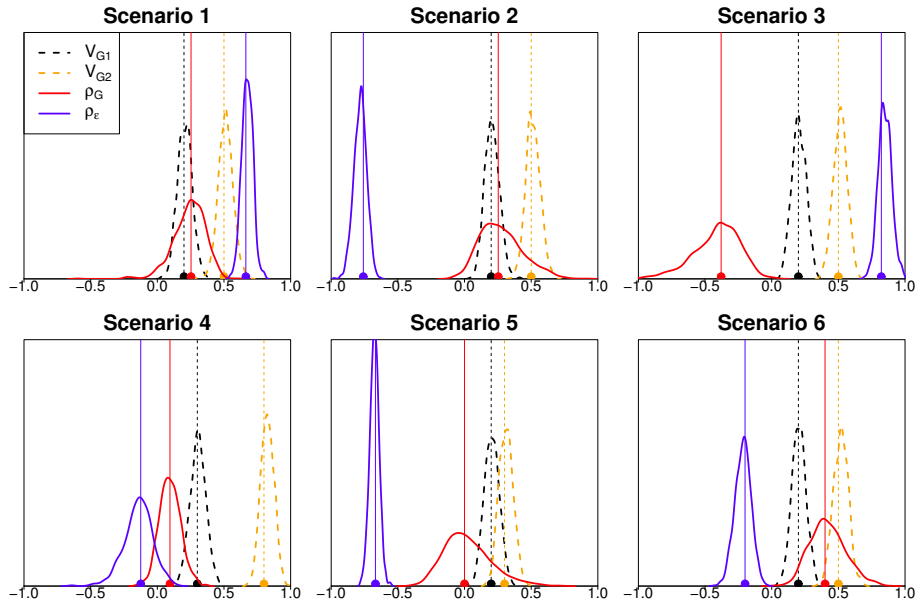

Figure S5: Distribution of maximum likelihood estimates for four parameters (legend top-left) from biMM across 1,000 simulated data sets for each of the six scenarios of Table S2. The vertical lines show the values used in the simulation.

| Scenario | $V_{G1}$ |       | $V_{G2}$ |       | $\rho_G$ |       | $\rho_\varepsilon$ |       |
|----------|----------|-------|----------|-------|----------|-------|--------------------|-------|
|          | SD       | SE    | SD       | SE    | SD       | SE    | SD                 | SE    |
| 1        | 0.055    | 0.053 | 0.055    | 0.056 | 0.12     | 0.11  | 0.042              | 0.041 |
| 2        | 0.055    | 0.052 | 0.053    | 0.055 | 0.16     | 0.15  | 0.048              | 0.046 |
| 3        | 0.053    | 0.052 | 0.052    | 0.055 | 0.17     | 0.16  | 0.05               | 0.046 |
| 4        | 0.059    | 0.054 | 0.050    | 0.057 | 0.08     | 0.079 | 0.11               | 0.11  |
| 5        | 0.056    | 0.053 | 0.054    | 0.054 | 0.18     | 0.16  | 0.035              | 0.034 |
| 6        | 0.054    | 0.053 | 0.056    | 0.056 | 0.13     | 0.13  | 0.06               | 0.061 |

Table S3: Uncertainty of parameters for data simulation.  $V_{Gt}$  is the total genetic variance for trait  $t = 1, 2$ ,  $\rho_G$  is the genetic correlation between the traits,  $\rho_\varepsilon$  is the environmental correlation between the traits. For each scenario, SD is the empirical standard deviation of the point estimates and SE is the median of the analytically calculated standard errors.

These results give confidence that we can interpret the estimates from biMM according to the heritability and correlation parameters of the polygenic model, even when the polygenic assumption is violated by a large majority of the variants having no effect on the traits at least as long as the variants with effects are a random sample from all variants included in the model.

The second derivatives allow analytic estimation of standard error for each parameter. If the sampling distribution of the parameter estimate were Gaussian, then the standard error would estimate the standard deviation of that sampling distribution. Table S3 shows empirical standard deviation of the parameter estimates over the simulations together with the median of the standard errors over the same simulations. In general, the results show that the estimated standard error gives a good estimate of the magnitude of the empirical standard deviation. It seems that the standard errors typically underestimate slightly the standard deviations for the correlation parameters and for smaller heritability values ( $V_{G1}$ ) whereas for larger heritability values ( $V_{G2}$ ) the standard errors overestimate slightly the standard deviations. We note that the sampling distributions for these parameters might not follow a Gaussian near the boundary values of the parameter (0 for variances, and  $\pm 1$  for correlations) and the interpretation of standard error is not as straightforward there.

## References

- [1] BK Bulik-Sullivan, HK Finucane, V Anttila, A Gusev, FD Day, PR Loh, ReproGen Consortium, Psychiatric Genomics Consortium, Genetic Consortium for Anorexia Nervosa of the Wellcome Trust Case Control Consortium 3, L Duncan, JRB Perry, N Patterson, EB Robinson, MJ Daly, AL Price, and BM Neale. An atlas of genetic correlations across human diseases and traits. *Nat Gen*, 47:1236–1241, 2015.
- [2] BK Bulik-Sullivan, PR Loh, HK Finucane, S Ripke, J Yang, Schizophrenia Working Group of the Psychiatric Genomics Consortium, N Patterson, MJ Daly, AL Price, and BM Neale. LD Score regression distinguishes confounding from polygenicity in genome-wide association studies. *Nat Gen*, 47:291–295, 2015.
- [3] OSP Davis, G Band, M Pirinen, CMA Haworth, EL Meabury, Y Kavas, N Harlaar, SJ Docherty, KB Hanscombe, M Trzaskowski, CJ C Curtis, A Strange, C Freeman, C Bellenguez, Z Su, R Pearson, D Vukcevic, C Langford, P Deloukas, S Hunt, E Gray, S Dronov, SC Potter, A Tashakkori-Ghanbaria, S Edkins, JM Blackwell SJ Bumpstead, E Bramon, MA Brown, JP Casas, A Corvin, A Duncanson, JAZ Jankowski, HS Markus, CG Mathew, CNA Palmer, A Rautanen, SJ Sawcer, RC Trembath, AC Viswanathan, NW Wood, I Barroso, L Peltonen, PS Dale, SA Petrill, LS Schalkwyk, IW Craig, CM Lewis, TS Price, P Donnelly The Wellcome Trust Case Control Consortium, R Plomin, and CCA Spencer. The correlation between reading and mathematics ability at age twelve has a substantial genetic component. *Nat Commun*, 5:4204, 2014.
- [4] IJ Deary, J Yang, G Davies, SE Harris, A Tenesa, D Liewald, M Luciano, LM Lopez, AJ Gow, J Corley, P Redmond, HC Fox, SJ Rowe, P Haggarty, G McNeill, ME Goddard, DJ Porteous, LJ Whalley, JM Starr, and PM Visscher. Genetic contributions to stability and change in intelligence from childhood to old age. *Nature*, 482:212–215, 2012.
- [5] GH Golub and CF Van Loan. *Matrix Computations*. The Johns Hopkins University Press, Baltimore, USA, 3rd edition, 1996.
- [6] A Korte, BJ Vilhjalmsson, V Segura, A Platt, Q Long, and M Nordborg. A mixed-model approach for genome-wide association studies of correlated traits in structured populations. *Nat Gen*, 44:1066–1071, 2012.
- [7] C Lippert, J Listgarten, Y Liu, C M Kadie, R I Davidson, and D Heckerman. FaST linear mixed models for genome-wide association studies. *Nat Methods*, 8:833–835, 2012.
- [8] PR Loh, G Bhatia, A Gusev, HK Finucane, BK Bulik-Sullivan, SJ Pollack, Schizophrenia Working Group of the Psychiatric Genomics Consortium, TR de Candia, SH Lee, NR Wray, KS Kendler, MC O’Donovan,

- BM Neale, N Patterson, and AL Price. Contrasting genetic architectures of schizophrenia and other complex diseases using fast variance-components analysis. *Nat Gen*, 47:1385–1392, 2015.
- [9] M Pirinen, P Donnelly, and C Spencer. Efficient computation with a linear mixed model on large-scale data sets with applications to genetic studies. *Ann Appl Stat*, 7:369–390, 2013.
- [10] P Rantakallio. Groups at risk in low birth weight infants and perinatal mortality. *Acta Paediatr Scand*, 193:191, 1969.
- [11] JR Silvester. Determinants of block matrices. *Math Gazette*, 10:460–467, 2000.
- [12] T Tukiainen, M Pirinen, AP Sarin, C Ladenvall, Jo Kettunen, T Lehtimäki, ML Lokki, M Perola, J Sinisalo, E Vlachopoulou, JG Eriksson, L Groop, A Jula, MR Järvelin, OT Raitakari, V Salomaa, and S Ripatti. Chromosome x-wide association study identifies loci for fasting insulin and height and evidence for incomplete dosage compensation. *PLoS Gen*, 10:e1004127, 2014.
- [13] PM Visscher, J Yang, and ME Goddard. A commentary on "Common SNPs explain a large proportion of the heritability for human height" by Yang et al. (2010). *Twin Research and Human Genetics*, 13:517–524, 2010.
- [14] J Yang, A Bakshi, Z Zhu, G Hemani, AAE Vinkhuyzen, SH Lee, MR Robinson, JRB Perry, IM Nolte, JV van Vliet-Ostaptchouk, H Snieder, The LifeLines Cohort Study, T Esko, L Milani, R Mägi, A Metspalu, A Hamsten, PKE Magnusson, NL Pedersen, E Ingelsson, N Soranzo, MC Keller, NR Wray, ME Goddard, and PM Visscher. Genetic variance estimation with imputed variants finds negligible missing heritability for human height and body mass index. *Nat Gen*, 47:1114–1120, 2015.
- [15] J Yang, B Benyamin, BP McEvoy, S Gordon, AK Henders, DR Nyholt, PA Madden, AC Heath, NG Martin, GW Montgomery, ME Goddard, and PM Visscher. Common SNPs explain a large proportion of the heritability for human height. *Nat Gen*, 42:565–569, 2010.
- [16] J Yang, SH Lee, ME Goddard, and PM Visscher. GCTA: a tool for genome-wide complex trait analysis. *Am J Hum Genet*, 88:76–82, 2011.
- [17] N Zaitlen and P Kraft. Heritability in the genome-wide association era. *Hum Gen*, 131:1655–1664, 2012.
- [18] X Zhou and M Stephens. Genome-wide efficient mixed-model analysis for association studies. *Nat Gen*, 44:821–824, 2012.
- [19] X Zhou and M Stephens. Efficient multivariate linear mixed model algorithms for genome-wide association studies. *Nat Methods*, 11:407–409, 2014.
